# Supplementary material for: Sustained cell polarity and virulence in the phytopathogenic fungusUstilago maydisdepends on an essential cyclin-dependent kinase from the Cdk5/Pho85 family
Source: Oxford University Press journal article supplement (doi:10.1242/jcs.005314), 2007-04-04
Supplement: jcs005314tables1.pdf [file jcs005314tables1.pdf]

**Table S1.** *U. maydis* strains used in this study

| Strain                       | Relevant genotype                                                     | Reference                     |
|------------------------------|-----------------------------------------------------------------------|-------------------------------|
| FB1                          | <i>a1 b1</i>                                                          | Banuett and Herskowitz, 1989  |
| FB2                          | <i>a2 b2</i>                                                          | Banuett and Herskowitz, 1989  |
| FBD11                        | <i>a1a2 b1b2</i>                                                      | Banuett and Herskowitz, 1989  |
| AB31                         | <i>a2 P<sub>crg1</sub>:bW2 P<sub>crg1</sub>:bE1</i>                   | Brachmann <i>et al</i> , 2001 |
| FB1P <sub>crg1</sub> :fuz7DD | <i>a1 b1 P<sub>crg1</sub>:fuz7<sup>DD</sup></i>                       | Müller <i>et al</i> , 2003    |
| SONU78d                      | <i>a1 a2 b1b2 cdk5 Δcdk5</i>                                          | This work                     |
| SONU80d                      | <i>a1 a2 b1b2 cdk5 cdk5-myc</i>                                       | This work                     |
| SONU99                       | <i>a1 b1 cdk5<sup>ts</sup></i>                                        | This work                     |
| SONU107                      | <i>a2 b2 cdk5<sup>ts</sup></i>                                        | This work                     |
| UMP57                        | <i>a1 b1 P<sub>crg1</sub>:wee1</i>                                    | This work                     |
| UMP58                        | <i>a1 b1 cdk5<sup>ts</sup> P<sub>crg1</sub>:wee1</i>                  | This work                     |
| UMP65                        | <i>a1 b1 myo5-GFP</i>                                                 | This work                     |
| UMP66                        | <i>a1 b1 cdk5<sup>ts</sup> myo5-GFP</i>                               | This work                     |
| UMP67                        | <i>a1 b1 cdk5<sup>ts</sup> P<sub>crg1</sub>:fuz7<sup>DD</sup></i>     | This work                     |
| UMP71                        | <i>a1 b1 fim1-GFP</i>                                                 | This work                     |
| UMP72                        | <i>a1 b1 cdk5<sup>ts</sup> fim1-GFP</i>                               | This work                     |
| UMP73                        | <i>a1 b1 P<sub>crg1</sub>:T7rac1</i>                                  | This work                     |
| UMP74                        | <i>a1 b1 P<sub>crg1</sub>:T7rac1<sup>QL</sup></i>                     | This work                     |
| UMP75                        | <i>a1 b1 cdk5<sup>ts</sup> P<sub>crg1</sub>:T7rac1</i>                | This work                     |
| UMP76                        | <i>a1 b1 cdk5<sup>ts</sup> P<sub>crg1</sub>:T7rac1<sup>QL</sup></i>   | This work                     |
| UMP80                        | <i>a1 b1 P<sub>crg1</sub>:cdc24</i>                                   | This work                     |
| UMP82                        | <i>a1 b1 cdk5<sup>ts</sup> P<sub>crg1</sub>:cdc24</i>                 | This work                     |
| UMP86                        | <i>a2 P<sub>crg1</sub>:bW2 P<sub>crg1</sub>:bE1 cdk5<sup>ts</sup></i> | This work                     |
| UMI29                        | <i>a1 b1 cdc24-GFP</i>                                                | This work                     |
| UMI30                        | <i>a1 b1 cdk5<sup>ts</sup> cdc24-GFP</i>                              | This work                     |
| UMI72                        | <i>a1 b1 cdk5-GFP</i>                                                 | This work                     |
| UMI74                        | <i>a1 b1 cdk5<sup>ts</sup> myo5-GFP P<sub>crg1</sub>:cdc24</i>        | This work                     |
